# Supplementary material for: An Enzymatic and Proteomic Analysis of Panus lecomtei during Biodegradation of Gossypol in Cottonseed
Source: MDPI journal article supplement (doi:10.3390/jof10050321), 2024-04-27
Supplement: s1 [file s1]

**Supplementary Table S1.** Purification analysis of the laccase enzyme using molecular exclusion chromatography of fractions obtained from the cultivation of *Panus lecomtei* CC 40 for 12 days in untreated crushed whole cottonseed-containing gossypol (CWCS) and crushed whole cottonseed chemically treated (CWCT) with 2% Ca(OH)<sub>2</sub>. S= After Superdex S-200.

| <b>Fraction</b>    | <b>Volume (ml)</b> | <b>Protein (mg/ml)</b> | <b>Enzyme Activity (U/ml)</b> |
|--------------------|--------------------|------------------------|-------------------------------|
| CWCS-Crude extract | 10                 | 5,28                   | 316,68                        |
| CWCS-S1            | 2                  | 0,15                   | 0,00                          |
| CWCS-S2            | 2                  | 0,30                   | 16,67                         |
| CWCS-S3            | 2                  | 1,15                   | 27,78                         |
| CWCS-S4            | 2                  | 0,12                   | 0,00                          |
| CWCS-S5            | 2                  | 0,96                   | 0,00                          |
| CWCS-S6            | 2                  | 0,88                   | 0,00                          |
| CWCS-S7            | 2                  | 0,85                   | 0,00                          |
| CWCS-S8            | 2                  | 0,65                   | 0,00                          |
| CWCS-S9            | 2                  | 0,63                   | 0,00                          |
| CWCT-Crude extract | 10                 | 2,34                   | 51,08                         |
| CWCT-S2            | 2                  | 0,11                   | 16,67                         |
| CWCT-S3            | 2                  | 0,30                   | 0,00                          |
| CWCT-S4            | 2                  | 0,12                   | 0,00                          |
| CWCT-S5            | 2                  | 0,92                   | 0,00                          |
| CWCT-S6            | 2                  | 0,91                   | 0,00                          |
| CWCT-S7            | 2                  | 0,79                   | 0,00                          |
| CWCT-S8            | 2                  | 0,83                   | 0,00                          |
